# Supplementary material for: Novel small molecules affecting cell membrane as potential therapeutics for avian pathogenic Escherichia coli
Source: PubMed Central journal article supplement (PMC6193035; doi:10.1038/s41598-018-33587-5), 2018-10-17
Supplement: 41598_2018_33587_MOESM1_ESM.pdf [file 41598_2018_33587_MOESM1_ESM.pdf]

1 **Novel small molecules affecting cell membrane as potential therapeutics for**  
2 **avian pathogenic *Escherichia coli***

3

4 Dipak Kathayat, Yosra A. Helmy, Loic Deblais, and Gireesh Rajashekara\* .

5

6

7

8

9

10

11

12

13

14

15

16

17

18

19 **Table S1.** Composition of M63 minimal media.

| 5X M63 stock (per litre)                        |          |
|-------------------------------------------------|----------|
| (NH <sub>4</sub> ) <sub>2</sub> SO <sub>4</sub> | 10 g     |
| KH <sub>2</sub> PO <sub>4</sub>                 | 68 g     |
| FeSO <sub>4</sub> .7H <sub>2</sub> O            | 2.5 g    |
| Adjust to pH 7 with NaOH                        |          |
| Autoclave (121 <sup>0</sup> C, 15 mins)         |          |
| 1X M63 working solution (per litre)             |          |
| 5X M63                                          | 200 mL   |
| 1M MgSO <sub>4</sub> .7H <sub>2</sub> O         | 1 mL     |
| 20% Glucose                                     | 10 mL    |
| 0.5% Thiamine                                   | 0.1 mL   |
| 20% Casamino Acids                              | 5 mL     |
| Sterilized Milipore Water                       | 783.9 mL |

20

21

22

23

24

25

26

27

28

29

30

31 **Table S2.** List of beneficial microbes and pathogenic STEC strains used in this study along with  
 32 their growth media and conditions.

| Microbes   | Bacterial spp.                        | Media                      | Culture conditions                           | Reference/Source                                          |
|------------|---------------------------------------|----------------------------|----------------------------------------------|-----------------------------------------------------------|
| Beneficial | <i>Enterococcus faecalis</i>          | MRS broth                  | 37 <sup>0</sup> C, anaerobic, 16-18 h        | David Francis, SDSU                                       |
|            | <i>Streptococcus bovis</i>            | MRS broth                  | 37 <sup>0</sup> C, anaerobic, 16-18 h        | David Francis, SDSU                                       |
|            | <i>Lactobacillus brevis</i>           | MRS broth                  | 37 <sup>0</sup> C, anaerobic, 1-2 days       | David Francis, SDSU                                       |
|            | <i>Lactobacillus acidophilus</i>      | MRS broth                  | 37 <sup>0</sup> C, anaerobic, 1-2 days       | David Francis, SDSU                                       |
|            | <i>Lactobacillus rhamnosus</i> GG     | MRS broth                  | 37 <sup>0</sup> C, anaerobic, 1-2 days       | ATCC, Manassas, VA, USA                                   |
|            | <i>Bifidobacterium longum</i>         | MRS broth + 0.05% Cysteine | 37 <sup>0</sup> C, anaerobic, 24 h           | David Francis, SDSU                                       |
|            | <i>Bifidobacterium adolescentis</i>   | MRS broth + 0.05% Cysteine | 37 <sup>0</sup> C, anaerobic, 24 h           | David Francis, SDSU                                       |
|            | <i>Bifidobacterium lactis</i> Bb12    | MRS broth + 0.05% Cysteine | 37 <sup>0</sup> C, anaerobic, 24 h           | Christian Hansen Ltd., Hørsholm, Denmark                  |
|            | <i>Clostridium clostridioforme</i>    | BHI broth + 5% Horse blood | 37 <sup>0</sup> C, anaerobic, 6-7 days       | David Francis, SDSU                                       |
|            | <i>Escherichia coli</i> Nissle 1917   | LB broth                   | 37 <sup>0</sup> C, aerobic, 10-12 h, 200 rpm | Dr. Ulrich Sonnenborn, Ardeypharm GmbH, Herdecke, Germany |
| Pathogenic | <i>Escherichia coli</i> G58-1         | LB broth                   | 37 <sup>0</sup> C, aerobic, 10-12 h, 200 rpm | David Francis, SDSU                                       |
|            | <i>Bacteroides thetaiotaomicron</i>   | MRS broth                  | 37 <sup>0</sup> C, anaerobic, 4-5 days       | David Francis, SDSU                                       |
|            | <i>Escherichia coli</i> O157- human   | LB broth                   | 37 <sup>0</sup> C, aerobic, 10-12 h, 200 rpm | Jeffrey T. LeJeune, FAHRP, OSU                            |
|            | <i>Escherichia coli</i> O26- human    | LB broth                   | 37 <sup>0</sup> C, aerobic, 10-12 h, 200 rpm | Jeffrey T. LeJeune, FAHRP, OSU                            |
|            | <i>Escherichia coli</i> O157 – cattle | LB broth                   | 37 <sup>0</sup> C, aerobic, 10-12 h, 200 rpm | Jeffrey T. LeJeune, FAHRP, OSU                            |
|            | <i>Escherichia coli</i> O157 –chicken | LB broth                   | 37 <sup>0</sup> C, aerobic, 10-12 h, 200 rpm | Jeffrey T. LeJeune, FAHRP, OSU                            |
|            | <i>Escherichia coli</i> O26 -chicken  | LB broth                   | 37 <sup>0</sup> C, aerobic, 10-12 h, 200 rpm | Jeffrey T. LeJeune, FAHRP, OSU                            |

34 **Table S3.** Standardization of Rif<sup>r</sup> APEC O78 infection dose for wax moth larvae.

| Rif <sup>r</sup> O78 inoculum<br>(CFU/larva) | Larva mortality (%) |      |      |      |      |      |
|----------------------------------------------|---------------------|------|------|------|------|------|
|                                              | 12 h                | 24 h | 36 h | 48 h | 60 h | 72 h |
| $4.25 \times 10^3$                           | 40                  | 70   | 80   | 80   | 90   | 90   |
| $4.25 \times 10^4$                           | 70                  | 90   | 100  | -    | -    | -    |
| $8.50 \times 10^{4+}$                        | 90                  | 100  | -    | -    | -    | -    |
| $4.25 \times 10^5$                           | 100                 | -    | -    | -    | -    | -    |

35 †inoculum caused 100% mortality within 24 h and provided the basis for selection of infection  
 36 dose to wax moth larvae.

37

38

39

40

41

42

43

44

45

46

47

48

49

50

51

52

53 **Table S4.** Minimum inhibitory concentration (MIC) and minimum bactericidal concentration (MBC) of 11 selected SMs against  
 54 different APEC serotypes.

|               | <b>Small molecules (MIC/MBC) (<math>\mu</math>M)</b> |          |          |          |           |           |          |           |          |           |           |
|---------------|------------------------------------------------------|----------|----------|----------|-----------|-----------|----------|-----------|----------|-----------|-----------|
|               | <b>1</b>                                             | <b>2</b> | <b>3</b> | <b>4</b> | <b>5</b>  | <b>6</b>  | <b>7</b> | <b>8</b>  | <b>9</b> | <b>10</b> | <b>11</b> |
| <b>O78</b>    | 200/200                                              | 100/100  | 100/100  | 25/50    | 12.5/25   | 12.5/25   | 25/50    | 12.5/25   | 25/50    | 25/50     | 100/100   |
| <b>O1</b>     | 200/250                                              | 200/250  | 100/200  | 25/50    | 12.5/12.5 | 12.5/25   | 50/100   | 12.5/25   | 25/50    | 25/25     | 100/100   |
| <b>O2</b>     | 200/200                                              | 200/250  | 100/200  | 25/50    | 12.5/25   | 25/25     | 25/50    | 25/50     | 25/50    | 25/50     | 100/200   |
| <b>O8</b>     | 200/200                                              | 100/200  | 100/100  | 25/25    | 12.5/12.5 | 12.5/12.5 | 100/200  | 25/100    | 25/50    | 50/50     | 200/200   |
| <b>O15</b>    | 200/250                                              | 100/100  | 100/100  | 25/25    | 12.5/12.5 | 12.5/25   | 50/50    | 12.5/50   | 25/100   | 50/100    | 100/100   |
| <b>O18</b>    | 200/200                                              | 100/200  | 100/100  | 25/50    | 12.5/12.5 | 12.5/25   | 50/100   | 12.5/50   | 25/100   | 25/100    | 200/200   |
| <b>O35</b>    | 200/200                                              | 100/200  | 100/200  | 25/25    | 12.5/25   | 12.5/25   | 25/50    | 12.5/25   | 25/50    | 25/50     | 100/200   |
| <b>O115</b>   | 200/200                                              | 200/200  | 100/100  | 25/25    | 12.5/12.5 | 12.5/25   | 100/100  | 12.5/50   | 25/50    | 25/50     | 200/200   |
| <b>O109</b>   | 200/200                                              | 100/200  | 100/200  | 25/25    | 12.5/12.5 | 12.5/12.5 | 100/100  | 12.5/25   | 25/50    | 25/50     | 200/200   |
| <b>O78-53</b> | 200/200                                              | 100/200  | 100/200  | 25/50    | 12.5/12.5 | 12.5/25   | 50/50    | 12.5/25   | 25/25    | 25/50     | 100/200   |
| <b>O1-63</b>  | 200/250                                              | 200/250  | 200/200  | 25/50    | 12.5/25   | 12.5/25   | 50/100   | 25/50     | 50/100   | 50/100    | 100/200   |
| <b>O2-211</b> | 200/200                                              | 100/100  | 100/100  | 25/25    | 12.5/12.5 | 12.5/12.5 | 50/50    | 12.5/12.5 | 25/25    | 25/50     | 100/100   |

55

56

57

58

59

60

61 **Table S5.** Antimicrobial susceptibility profiles of APEC serotypes.

|               | <b>MIC (<math>\mu\text{g/mL}</math>)</b> |                      |                 |                     |
|---------------|------------------------------------------|----------------------|-----------------|---------------------|
|               | <b>Ampicillin</b>                        | <b>Ciprofloxacin</b> | <b>Colistin</b> | <b>Tetracycline</b> |
| <b>O78</b>    | >64 (R)                                  | 0.125                | 0.25            | 32 (R)              |
| <b>O1</b>     | >64 (R)                                  | <0.03125             | 0.5             | >64 (R)             |
| <b>O2</b>     | >64 (R)                                  | <0.03125             | 0.5             | >64 (R)             |
| <b>O8</b>     | 4                                        | <0.03125             | 1               | >64 (R)             |
| <b>O15</b>    | 2                                        | <0.03125             | 1               | >64 (R)             |
| <b>O18</b>    | 4                                        | 4 (R)                | 1               | 2                   |
| <b>O35</b>    | 2                                        | <0.03125             | 1               | 1                   |
| <b>O109</b>   | >64 (R)                                  | <0.03125             | 0.5             | 1                   |
| <b>O115</b>   | >64 (R)                                  | <0.03125             | 1               | >64 (R)             |
| <b>O78-53</b> | 4                                        | <0.03125             | 0.5             | >64 (R)             |
| <b>O1-63</b>  | 4                                        | <0.03125             | 4 (R)           | 16 (R)              |
| <b>O2-211</b> | 4                                        | <0.03125             | 4 (R)           | >64 (R)             |

62 Resistant APEC serotypes are depicted as (R).

63

64

65

66

67

68

69

70

71

72

73

74

75

76 **Table S6.** t-statistic values measuring the effect of SMs to clear intracellular APEC.

|             | <b>Caco-2</b>       |                     |                     | <b>HD11</b>          |                     |                     | <b>THP-1</b>        |                      |                     |
|-------------|---------------------|---------------------|---------------------|----------------------|---------------------|---------------------|---------------------|----------------------|---------------------|
|             | <b>O78</b>          | <b>O2</b>           | <b>O1</b>           | <b>O78</b>           | <b>O2</b>           | <b>O1</b>           | <b>O78</b>          | <b>O2</b>            | <b>O1</b>           |
| <b>SM1</b>  | -8.08 <sup>a</sup>  | -15.12 <sup>b</sup> | -11.33 <sup>b</sup> | -10.48 <sup>a</sup>  | -6.98 <sup>a</sup>  | -9.11 <sup>a</sup>  | -15.39 <sup>a</sup> | -139.34 <sup>b</sup> | -18.03 <sup>a</sup> |
| <b>SM2</b>  | -8.20 <sup>a</sup>  | -10.13 <sup>b</sup> | -6.68 <sup>a</sup>  | -8.47 <sup>a</sup>   | -5.28 <sup>a</sup>  | -9.76 <sup>a</sup>  | -7.96 <sup>a</sup>  | -138.34 <sup>b</sup> | -20.52 <sup>a</sup> |
| <b>SM3</b>  | -14.33 <sup>a</sup> | -6.97 <sup>b</sup>  | -24.49 <sup>c</sup> | -11.43 <sup>a</sup>  | -7.34 <sup>a</sup>  | -8.79 <sup>a</sup>  | -11.55 <sup>a</sup> | -3.22 <sup>a</sup>   | -10.20 <sup>a</sup> |
| <b>SM4</b>  | -16.22 <sup>a</sup> | -14.45 <sup>c</sup> | -49.89 <sup>c</sup> | -8.44 <sup>a</sup>   | -7.64 <sup>a</sup>  | -5.77 <sup>b</sup>  | -4.50 <sup>a</sup>  | -4.33 <sup>b</sup>   | -18.46 <sup>b</sup> |
| <b>SM5</b>  | -5.38 <sup>b</sup>  | -14.75 <sup>c</sup> | -4.13 <sup>c</sup>  | -7.75 <sup>b</sup>   | -10.60 <sup>b</sup> | -9.59 <sup>b</sup>  | -10.56 <sup>b</sup> | -11.12 <sup>c</sup>  | -24.69 <sup>b</sup> |
| <b>SM6</b>  | -14.23 <sup>c</sup> | -17.80 <sup>c</sup> | -12.51 <sup>c</sup> | -9.17 <sup>b</sup>   | -11.64 <sup>b</sup> | -10.08 <sup>b</sup> | -7.94 <sup>b</sup>  | -10.12 <sup>c</sup>  | -18.77 <sup>b</sup> |
| <b>SM7</b>  | -8.96 <sup>b</sup>  | -21.23 <sup>c</sup> | -3.50 <sup>b</sup>  | -7.87 <sup>b</sup>   | -4.22 <sup>b</sup>  | -9.48 <sup>b</sup>  | -6.63 <sup>b</sup>  | -5.22 <sup>b</sup>   | -41.02 <sup>b</sup> |
| <b>SM8</b>  | -3.46 <sup>b</sup>  | -6.65 <sup>b</sup>  | -43.60 <sup>b</sup> | -7.76 <sup>b</sup>   | -7.24 <sup>b</sup>  | -8.50 <sup>b</sup>  | -10.56 <sup>b</sup> | -4.78 <sup>b</sup>   | -30.91 <sup>b</sup> |
| <b>SM9</b>  | -8.98 <sup>b</sup>  | -29.80 <sup>c</sup> | -9.42 <sup>c</sup>  | -9.76 <sup>c</sup>   | -12.72 <sup>c</sup> | -5.00 <sup>b</sup>  | -11.55 <sup>b</sup> | -3.89 <sup>b</sup>   | -84.43 <sup>b</sup> |
| <b>SM10</b> | -10.16 <sup>b</sup> | -9.39 <sup>b</sup>  | -3.41 <sup>b</sup>  | -116.35 <sup>c</sup> | -7.41 <sup>b</sup>  | -7.77 <sup>b</sup>  | -12.76 <sup>b</sup> | -7.11 <sup>b</sup>   | -16.69 <sup>b</sup> |
| <b>SM11</b> | -8.99 <sup>b</sup>  | -12.16 <sup>b</sup> | -14.32 <sup>b</sup> | -5.48 <sup>a</sup>   | -6.47 <sup>a</sup>  | -16.30 <sup>b</sup> | -16.87 <sup>a</sup> | -9.22 <sup>a</sup>   | -19.74 <sup>b</sup> |

77 <sup>a</sup>0.5X MIC, <sup>b</sup>1X MIC, <sup>c</sup>2XMIC.

Fig. S1

(A)

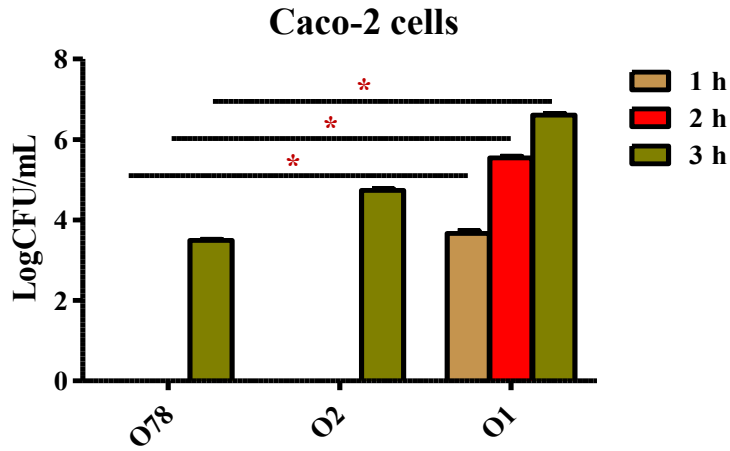

(B)

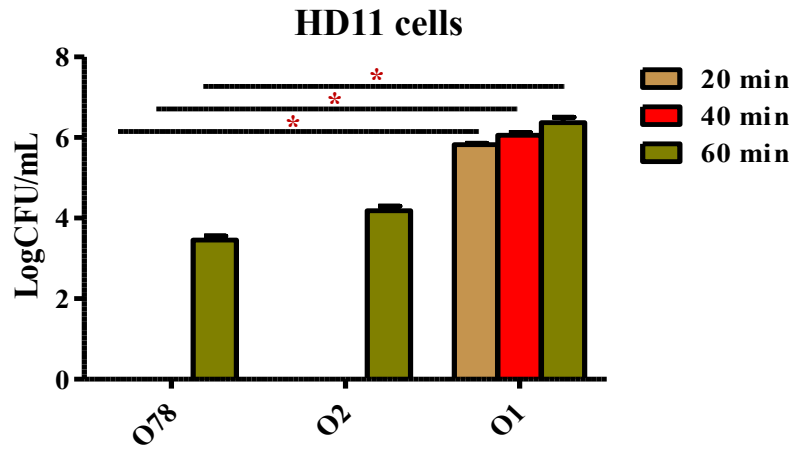

(C)

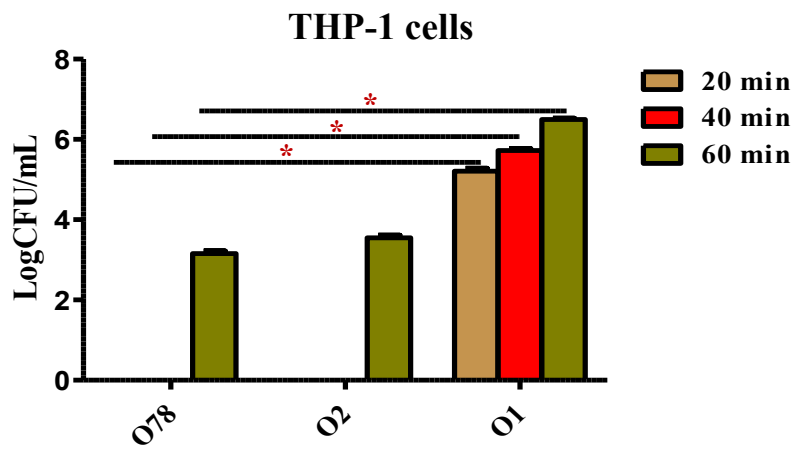



**Figure S1.** Effect of invasion time on the intracellular survival of APEC O78, O1, and O2 in (A) Caco-2, (B) HD11 and (C) THP-1 cells. Cells were infected at MOI:10 with APEC serotypes and were incubated for different time periods (Caco-2: 1, 2, and 3h; HD11/THP1: 20, 40, and 60 min) to allow bacterial invasion. Six hours following invasion, cells were lysed with 0.1% Triton X-100 and intracellular bacteria were quantified on LB agar plates. APEC O1 invades and survives intracellularly at significantly greater rate (comparable intracellular bacteria with 3 times less invasion time) than O2 and O78. \* $P < 0.01$ .

**Fig. S2**

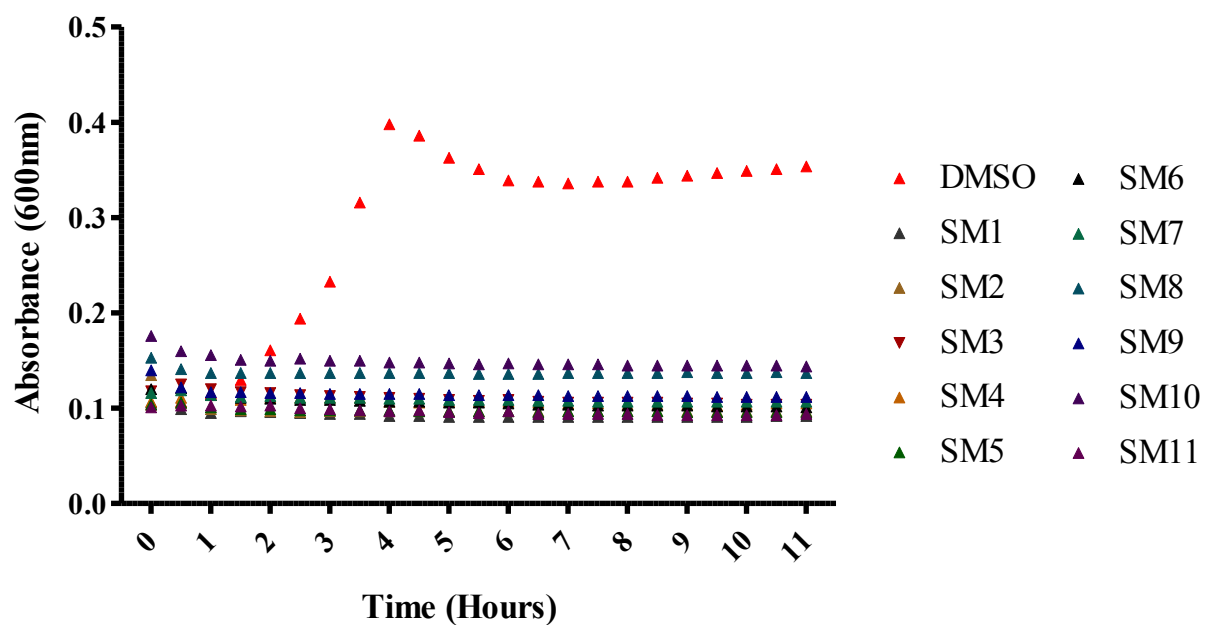

**Figure S2.** Effect of 11 cidal SMs to Rif<sup>r</sup> APEC O78. All SMs inhibited the growth of Rif<sup>r</sup> APEC O78 at respective MIC of wild type APEC O78 (**Table. S4**) as indicated by non-elevated OD.

**Fig. S3**

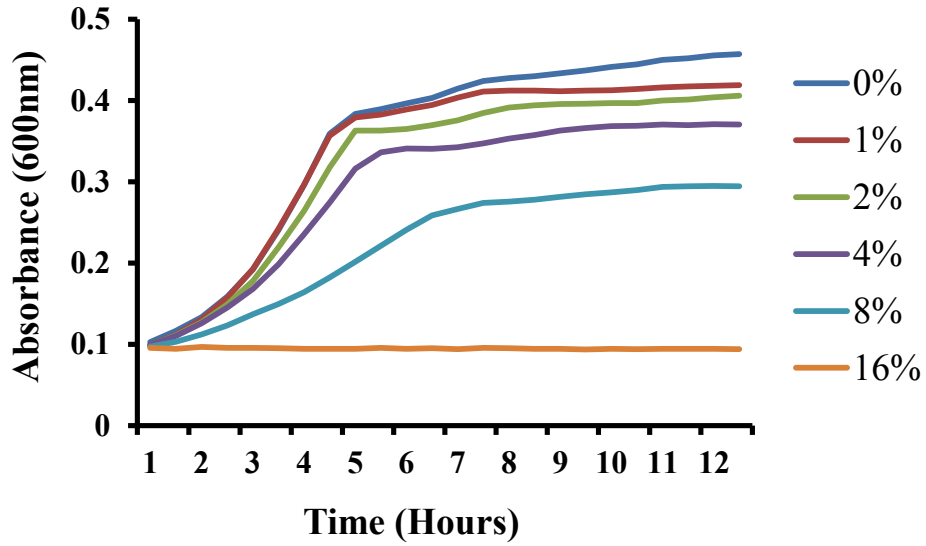

**Figure S3.** Antimicrobial activity of DMSO against APEC O78 in M63 media. APEC culture was incubated with different concentrations of DMSO followed by the monitoring of APEC growth for 12 h.

**Fig. S4**

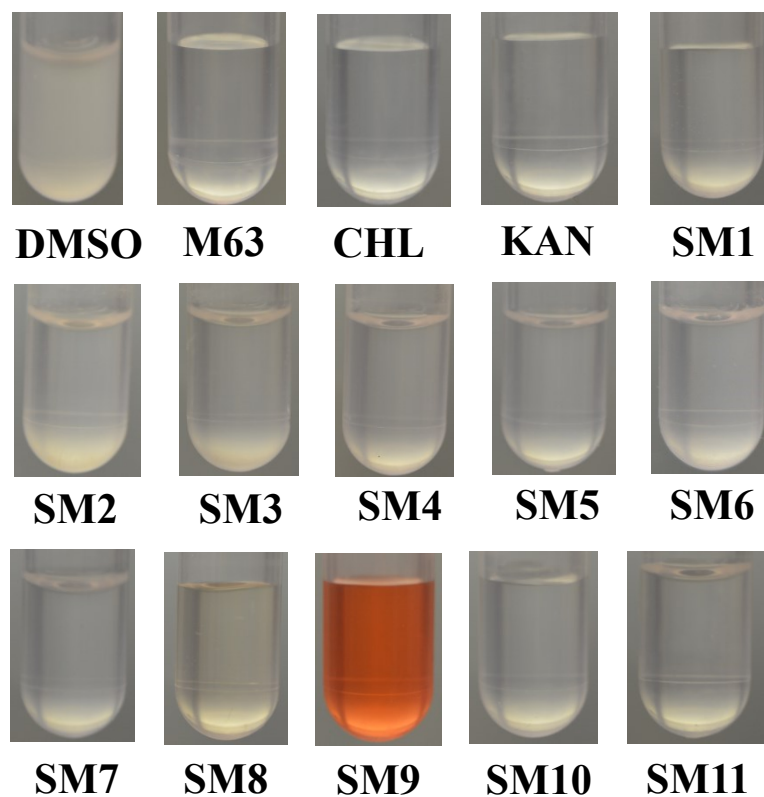

**Figure S4.** Resistance study in liquid media using sub-lethal concentration of SMs. APEC O78 was grown in the presence of 0.75X MIC of each SM in M63 media for 15 serial overnight passages and the bacteria were subsequently tested at the respective MIC. No turbidity was observed in the SMs treated cultures, while cultures treated with DMSO showed turbidity.

**Fig. S5**

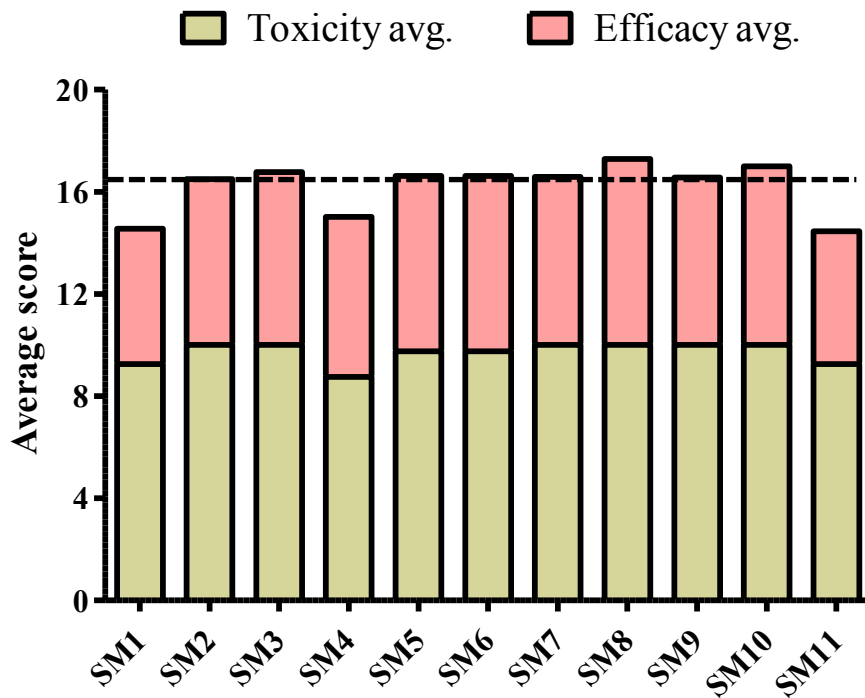

**Figure S5.** Prioritization of SMs based on their efficacy and toxicity. SMs toxicity (chicken & human cells, wax moth larvae) and efficacy parameters (MIC/MBC, spectrum, specificity, intracellular APEC clearance, wax moth survival, and reduction of biofilm embedded APEC) measured in this study were scored (1 to 10) and the scores were averaged as toxicity and efficacy average. SMs with average score above the demarcated line were regarded as potential anti-APEC therapeutics.
